# Supplementary material for: Effect of nitrogen limitation and soil processes on mid–Holocene greening of the Sahara
Source: Copernicus journal article supplement (doi:10.5194/cp-2021-75), 2021-06-29

Figure S1: JJAS Precipitation (a) difference and (b) area of difference significant at 95% in a Student's t test, (c) JJAS surface temperature and (d) JJAS surface pressure difference for 8KCN and 8KCN0L simulation (8KCN – 8KCN0L). The black box is the grid of prescribed lakes.

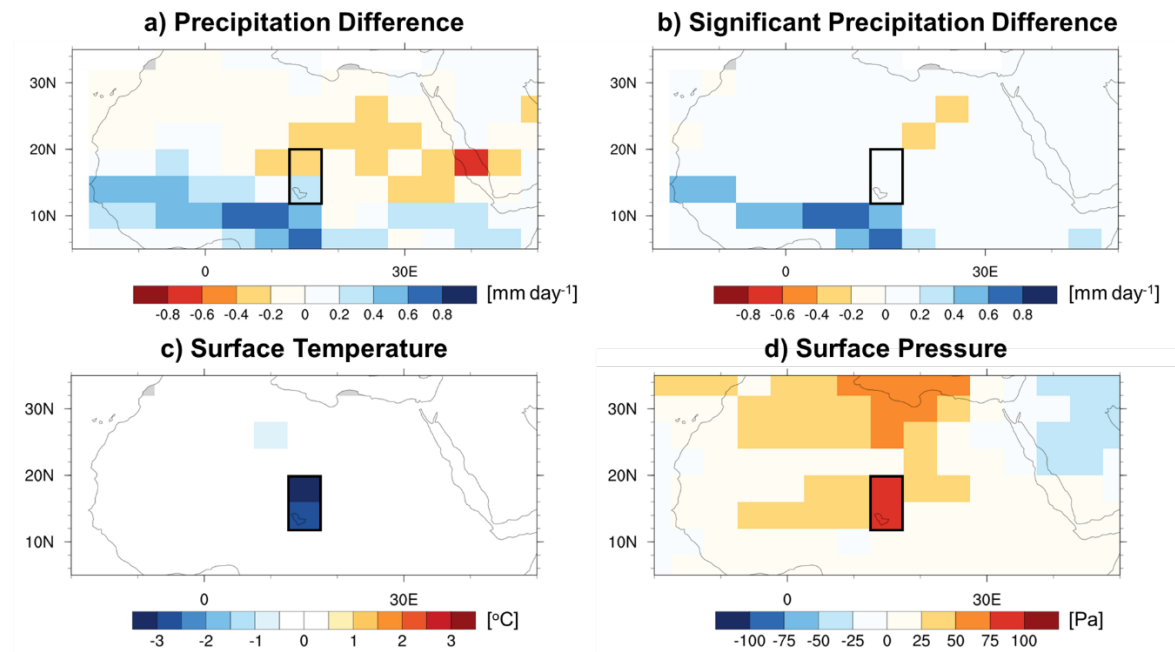

Figure S2: Annual precipitation of (a) 8KCN0L simulation (b) 8KCN simulation. 200 and 412 mm year<sup>-1</sup> isohyets are marked as black lines with its value.

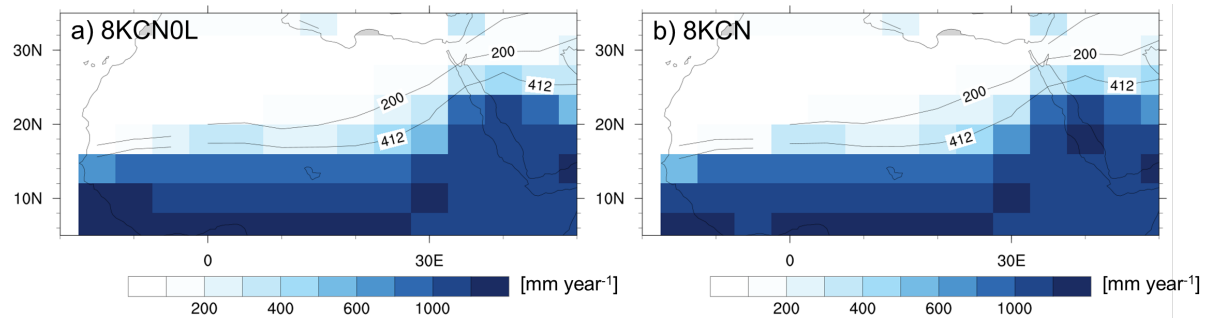

Figure S3: Difference of the half-nitrogen experiment (8KCNh) from 8KCN experiment, individually showing 8KCNh-8K results (a, c), 8KCN-8KCNh results (b, d) and 8KCNh results (e).

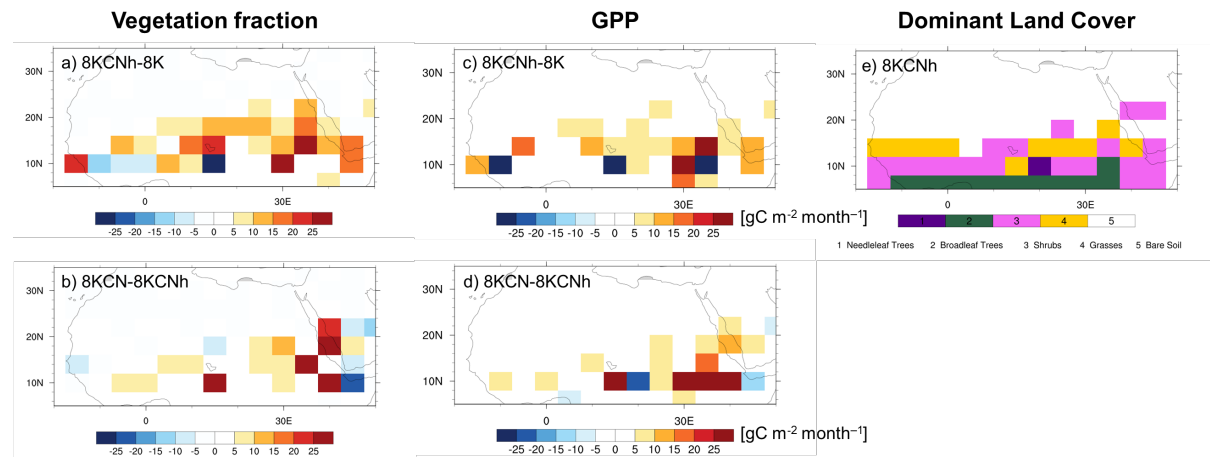

Supplement: Supplementary file 1 [file cp-2021-75-supplement.pdf]
